# Supplementary material
Source: publisher figshare collection journal article supplement (https://gsajournals.figshare.com/ndownloader/files/14411849)
Supplement: Supplementary file 1 [file 14411849]

# Supplemental Information for *Fast Estimation of Recombination Rates Using Topological Data Analysis*

D.P.H., M.R.M., M.M., and A.J.B.

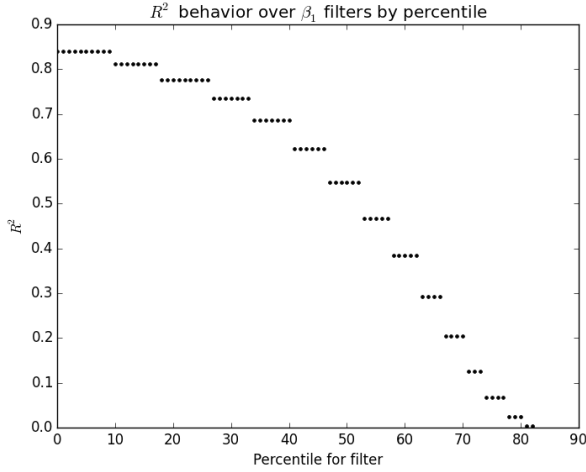

**Fig. 1.**  $R^2$  values decrease as we filter out bars of increasing lengths in terms of percentiles of the overall distribution of bar lengths across all simulated datasets.

*Filtering  $\beta_1$ .* Some authors have suggested that short-lived bars in a persistence diagram may arise due to topological noise (1). It is unclear whether a universal threshold exists to filter out potentially noisy bars, however. In the case of our own study, we tested whether filtering out short-lived bars improves the relationship between existing topological models of recombination and  $\beta_1$ , specifically using Camara et al's  $\rho_{ph}$  for goodness of fit. We find that the filtration of short-lived bars only lowers the  $R^2$  values for this model applied to our simulated datasets, thus we opt not to use any filtration of these bars in practical applications (Figure 1).

*Missing Data.* As large quantities of missing data are frequently encountered in empirical datasets, we investigated the performance of both  $\psi$  and  $\beta_1$  under various scenarios involving different amounts of missing data using the same datasets we simulated for our main coalescent investigation. Specifically, we took these existing datasets, duplicated them, and then converted randomly chosen sites or blocks of sites to N, in order to simulate missing data. For each dataset, a total of 10% of each sequence (and therefore, 10% of the total alignment) was converted to Ns. Since in all cases, 10% missing data was introduced into the alignments, we note that our specific interest here is in how robust each topological feature is to either a) a random distribution of missing sites, as would be common

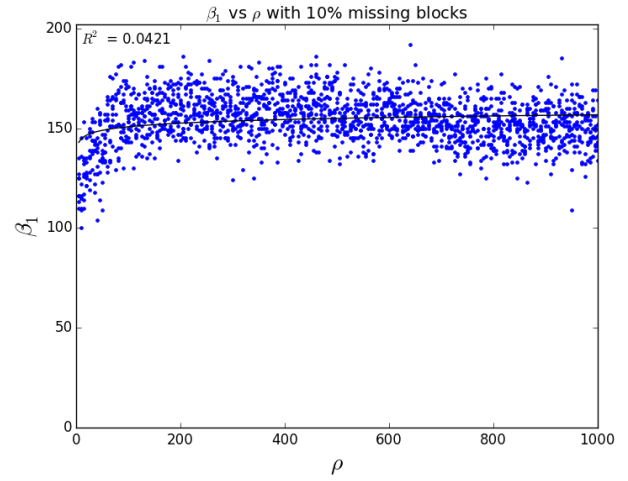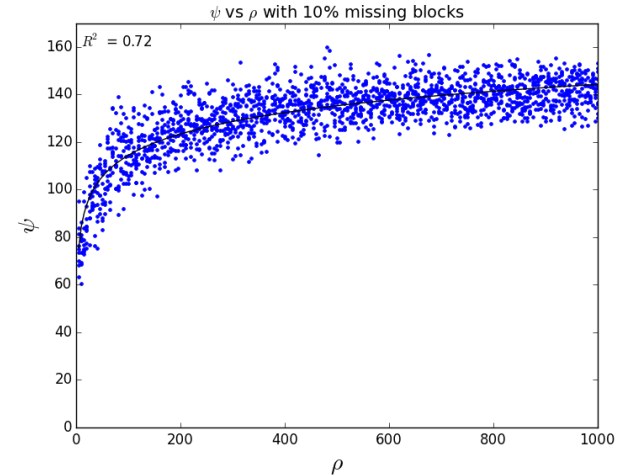

**Fig. 2.** Expectations of  $\psi$  and  $\beta_1$  given  $\rho$  when 10% of data is missing in large tandem blocks. In the case of  $\beta_1$ , the  $R^2$  value has dropped from 0.9 in the case of no missing data to 0.04, suggesting that this feature is highly sensitive to minimal missing data. In comparison,  $\psi$  maintains an  $R^2$  of 0.76, suggesting greater robustness to loss of information in sequence data.

with sequencing error, or b) tandemly linked missing sites, as common in indels. We find that, overall,  $\psi$  is much more robust to missing data than is  $\beta_1$  when predicting  $\rho$ . Specifically, we looked at the expectation of  $\beta_1$  and  $\psi$  given  $\rho$  as in Camara et. al's model, to see how well the model fits each topological

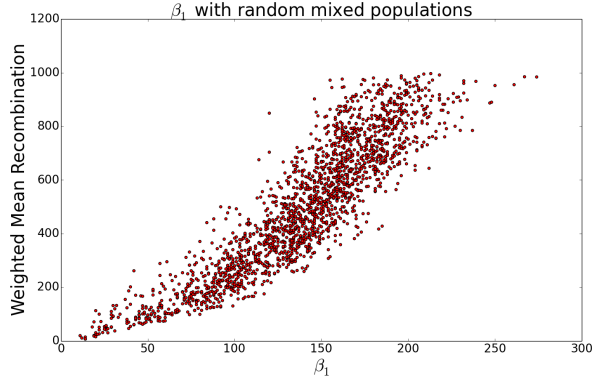

**Fig. 3.**  $\beta_1$  versus  $\bar{\rho}$  rate from randomly mixed populations of different recombination rates.

feature under each missing data scenario 2. We did this in order to evaluate the strength of the relationship without a prior expectation for the expectation of  $\psi$ , and found a greater fit to the Camara model describing the expectation of  $\psi$  in place of  $\beta_1$  given  $\rho$  in these circumstances than their original expectation of  $\beta_1$  given  $\rho$ .

When we invert the graph to see how  $\psi$  or  $\beta_1$  behave as predictors of  $\rho$ , we lose the fit to the Camara model. However, we observe similar differences in the variances of the two predictors, specifically noting that the variance in  $\beta_1$  remains higher and so poses greater uncertainty than does  $\psi$ .

**Mixing Populations.** We explored the robustness of  $\psi$  and  $\beta_1$  under mixed populations of varying recombination rate. In particular, we randomly sampled  $N$  individuals from a population of known recombination rate  $\rho_1$ , along with  $M$  individuals from a population of known recombination rate  $\rho_2$ . We kept  $N + M = 160$  constant while varying  $N$ ,  $M$ ,  $\rho_1$ , and  $\rho_2$ . These experiments were all done on the simulated data, and we fixed the population mutation rate to  $\theta = 25$ .

For each randomly concatenated population we computed the weighted mean recombination rate  $\bar{\rho} = \frac{N}{160} * \rho_1 + \frac{M}{160} * \rho_2$ . The results of comparing our main topological summary statistics  $\psi$  and  $\beta_1$  to the weighted mean recombination rate are presented in figures 3-4. We see that under randomly mixed populations  $\psi$  maintains a tight exponential relationship with  $\bar{\rho}$ . In comparison, in this setting the relationship between  $\beta_1$  and  $\bar{\rho}$  becomes noisier. The nice behavior of  $\psi$  is expected as mixing two distant populations only adds one non-informative coalescence event between the populations, and as a result has little effect on  $\psi$  other than averaging the recombination parameters of the samples.

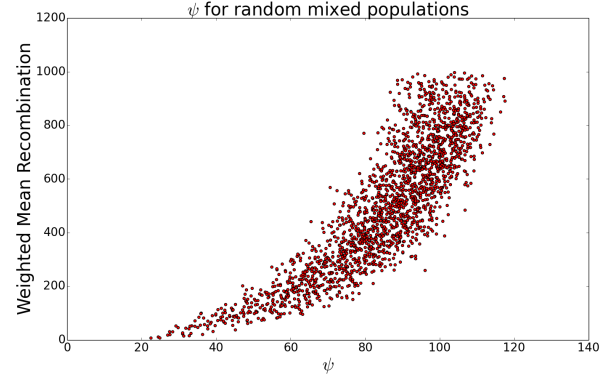

**Fig. 4.**  $\psi$  versus  $\bar{\rho}$  from randomly mixed populations of different recombination rates.

**LASSO Weights.** In order to gain intuition for which barcode statistics would be the best predictors for recombination we first ran a LASSO regression analysis using 15 barcode statistics as input and analyzed the resulting weight vector. We used the LASSO weight vectors as a proxy for the predictive power of each barcode statistic.

The barcode statistics we studied were the Betti number ( $\beta_i$ ), mean barcode length ( $\psi_i$ ), medium barcode length ( $m_i$ ), maximum barcode length ( $M_i$ ), and the thresholded Betti number ( $\beta_i^T$ ) in dimensions 0, 1, and 2. Here, the thresholded Betti number refers to the number of bars whose bar length is greater than a specified cutoff, where the cutoff is set as a percentage of maximum bar length  $M_i$ . In these experiments we tested thresholds corresponding to 10 – 60% of the maximum bar length.

We ran LASSO on the simulated data with fixed sample size using Scikit-learn (2) in Python 2.7. For each threshold, we ran LASSO 20 times on randomly selected training data. Initially we used all 15 barcode summary statistics as input and then analyzed the LASSO weight vectors for all 20 runs across the varying thresholds. These weight vectors are visualized in a heat map in Figure 5.

Observe, consistently  $\psi_0$  (or  $\psi$ ),  $m_0$ , and  $\beta_0^T$  are among most heavily weighted inputs, with  $\psi_0$  having the most influence overall. This motivated our rigorous exploration of  $\psi$  as an estimator for recombination rate. Also note that  $\beta_0$  has zero weight since  $\beta_0$  is precisely the sample size, which is constant in this experiment. Consequently,  $\beta_0^T$  only varies as  $M_0$  varies.

In contrast to the dimension-0 statistics, the dimension-1 barcode statistics have negligible weights across all model runs and all thresholds. Moreover, almost all of the dimension-2 barcode statistics have low weights across all model runs, with the exception of  $M_2$  whose weight increases as the threshold for  $\beta_i^T$  increases.

In an attempt to extract the best dimension-1 topological predictor for recombination, we re-ran the 20 runs of LASSO for varying thresholds using only the dimension-1 topological summary statistics as input. The results of this refined analysis are presented in Figure 6. Here we see that out of all the dimen-

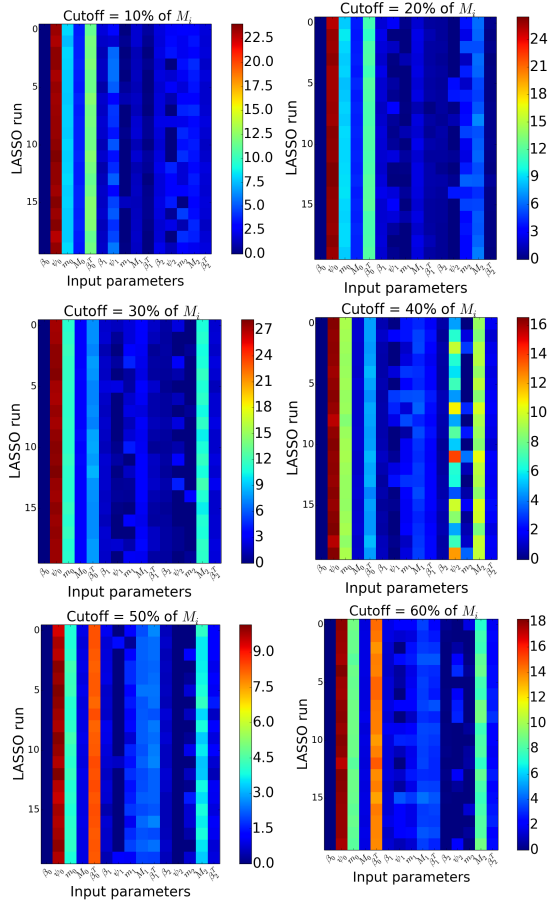

**Fig. 5.** Absolute value of LASSO weight vectors across 20 model runs on randomly selected 15-dimensional training data for varying thresholds for  $\beta_i^T$ .

sion 1 topological statistics,  $\beta_1$  is the most heavily weighted input feature when the threshold is set to  $\leq 30\%$  of  $M_i$ . For increased threshold values the weight of  $\beta_1$  decreases significantly and  $\psi_1$  is the most heavily weighted input features for the dimension 1 barcode statistics, although its weights vary greatly across different model runs. This is consistent with the results presented in *Filtering  $\beta_1$* , which suggest that filtering out short-lived bars hinders the predictive power of  $\beta_1$  for recombination estimates.

The results of these LASSO analyses provided us with the motivation to focus on understanding the significance of lower dimensional topological statistics as predictors for recombination. Moreover, we used the results of the dimension-1 LASSO analysis to decide which higher dimensional statistics to use in tandem with  $\psi$ . We chose to exclude dimension-2 statistics as predictors due to their overall low weight vectors and the lack of biological significance.

**Noise Experiments.** We further tested whether topological noise may contribute to relationships we observed between  $\beta_1$ ,  $\psi$ , and  $\rho$  by adding noise or randomizing sequences within datasets to obtain topological structures unrelated to recombination. In one experiment, we simulated realistic cases of

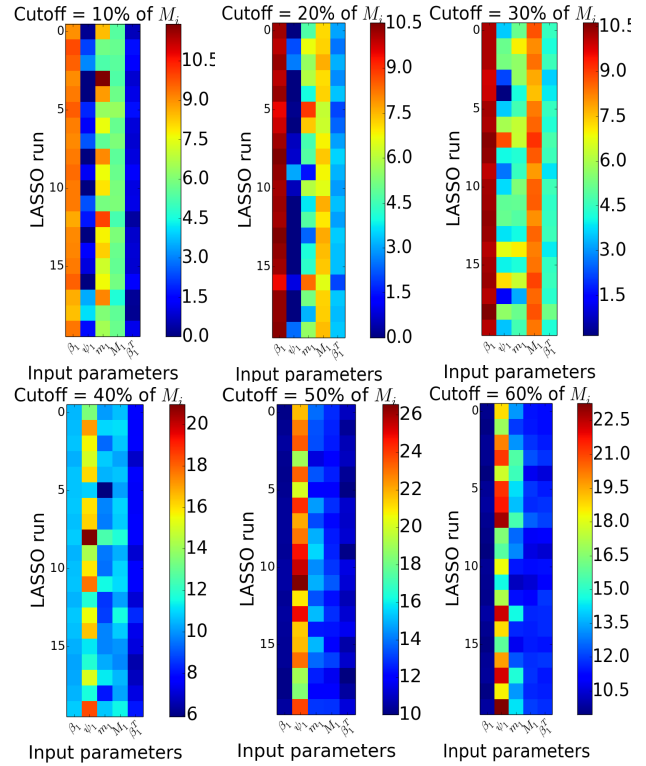

**Fig. 6.** Absolute value of LASSO weight vectors across 20 model runs on randomly selected dimension 1 training data for varying thresholds for  $\beta_i^T$ .

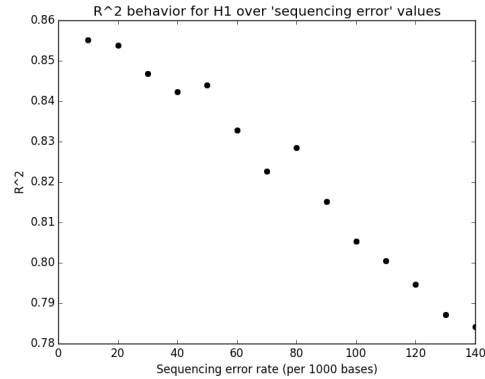

**Fig. 7.**  $R^2$  values decrease as we include increasing sequence errors, but remains greater than 0.75 over all realistic and slightly more extreme possible error rates.

sequencing error in each dataset by adding a random base over a range of error rates from 0 to 140 / 1000 bases (see Figure 7). As this error rate increases, we find a reduction in the fit of topological models in  $\beta_1$  to the data, but the decrease in fit is slow over all realistically expected error rates (around 10% sequencing error, we see no reduction in  $R^2$  for  $\rho_{ph}$ ).

**Other Relationships.** We tested for relationships between our topological features  $\psi$  and  $\beta_1$  and Watterson's  $\theta$ , as well as for possible correlations between the topological features them-

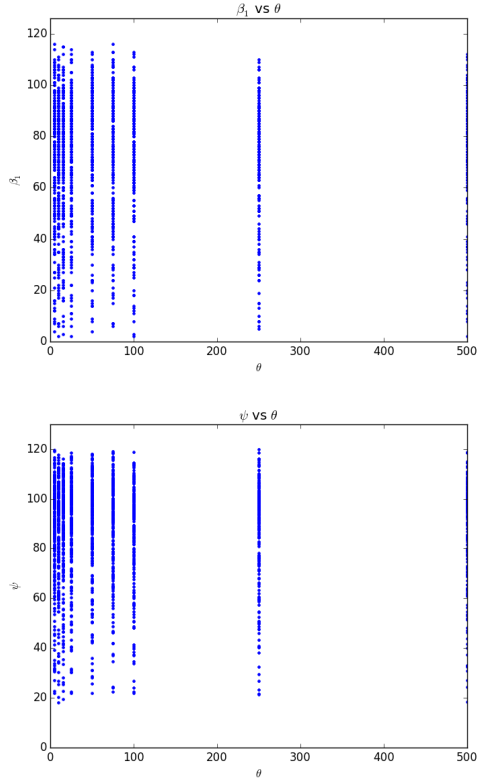

**Fig. 8.**  $\psi$  and  $\beta_1$  are uncorrelated with variance in  $\theta$ .

selves.

We computed each feature from the set of 3600 simulated sequence alignments with varying values of  $\rho$  and  $\theta$ , and produced similar correlation plots showing relationships between each pair of variables. We find that neither  $\beta_1$  nor  $\psi$  is correlated with Watterson's  $\theta$ , thus we can confidently assert that this is not a confounding factor in our analyses (Figure 8).

In contrast to this, we do find that  $\beta_1$  and  $\psi$  are correlated quite tightly in our work (Figure 9). While this correlation is expected since both statistics should be elevated in the presence of recombination events, we have noted in other experiments that  $\psi$  nevertheless adds unique information.

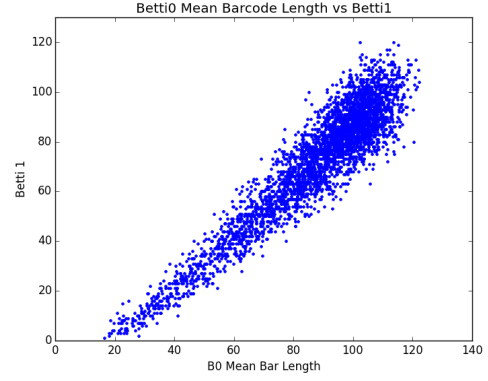

**Fig. 9.**  $\psi$  and  $\beta_1$  are tightly correlated over variable values of  $\rho$ .

1. Carlsson G (2009) Topology and data. *Bulletin of the American Mathematical Society* 46(2):255–308.
2. Pedregosa F, et al. (2011) Scikit-learn: Machine learning in python. *Journal of Machine Learning Research* 12:2825–2830.
